# Supplementary material for: Enhancing surface/interface activity and wettability via trimeric surfactant-containing mixtures
Source: Royal Society of Chemistry journal article supplement (doi:10.1039/d4sm01184h), 2025-01-01
Supplement: d4sm01184h1.pdf [file d4sm01184h1.pdf]

## Enhancing Surface/Interface Activity and Wettability *via* Trimeric Surfactant-Containing Mixtures

Chao Zhang<sup>a</sup>, Jianlin Jiang<sup>a</sup>, Lili Zhou<sup>b\*</sup>, Bin Qin<sup>a\*</sup> and Fulin Qiao<sup>a\*</sup>

<sup>a</sup>Sinopec research institute of petroleum processing CO. LTD.

<sup>b</sup>School of Light Industry Science and Engineering, Beijing Technology and Business University, Beijing 100048, P. R. China

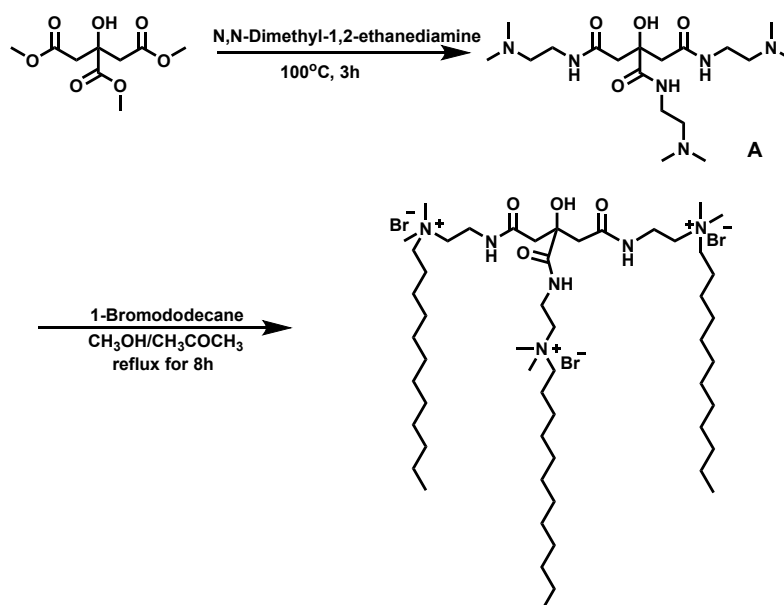

**Figure S1.** Synthetic procedure of **Citric-3C12**.

### Material.

*N,N*-Dimethyl-1,2-ethanediamine, trimethyl citrate and 1-bromododecane were obtained from Innochem and used without further purification. CH<sub>3</sub>OH, CH<sub>3</sub>COCH<sub>3</sub>, and all organic solvents were purchased from Beijing Chemical Co. Milli-Q (18.2 MΩ MΩ·cm) water was used in all experiments.

### Synthesis.

Compound **Citric-3C12** was synthesized as outlined in **Figure S1** and was characterized by <sup>1</sup>H NMR, mass spectrum. 2.34 g trimethyl citrate was dispersed in 20 mL *N,N*-Dimethyl-1,2-ethanediamine and stirred at 100°C for 4 h. The *N,N*-

Dimethyl-1,2-ethanediamine was then removed under reduced pressure, and the residue was recrystallized three times from methanol/ethyl acetate to afford intermediate **A**.

Intermediate **A** (4 g) and 1-bromododecane (8.9 g) were added to 100 mL of CH<sub>3</sub>OH/CH<sub>3</sub>COCH<sub>3</sub> (v: v = 1:1) and heated at 45 °C for 72 h. The solvent was removed under reduced pressure, and the residue was recrystallized three times from methanol/ethyl acetate, yielding **Citric-3C12** as white solid in 41% yield. <sup>1</sup>H NMR (CD<sub>3</sub>OD, 400 MHz): δ = 0.88 (m, 9H), 1.12–1.39 (m, 46H), 1.80 (s, 8H), 2.52-2.64 (m, 4H), 2.71–2.82(m, 4H), 3.00–3.06 (m, 5H), 3.06–3.17 (m, 12H), 3.17–3.29 (m, 4H), 3.28–3.50 (m, 12H), 3.51–3.69 (m, 8H). MS-ESI (m/z): calculated: 1146.64; found: 495.40 ([M-2Br]<sup>2+</sup>/2). FTIR (KBr, cm<sup>-1</sup>): 3225, 2907, 2827, 1648, 1458, 1349, 1228,1073, 1015, 969, 906, 739.

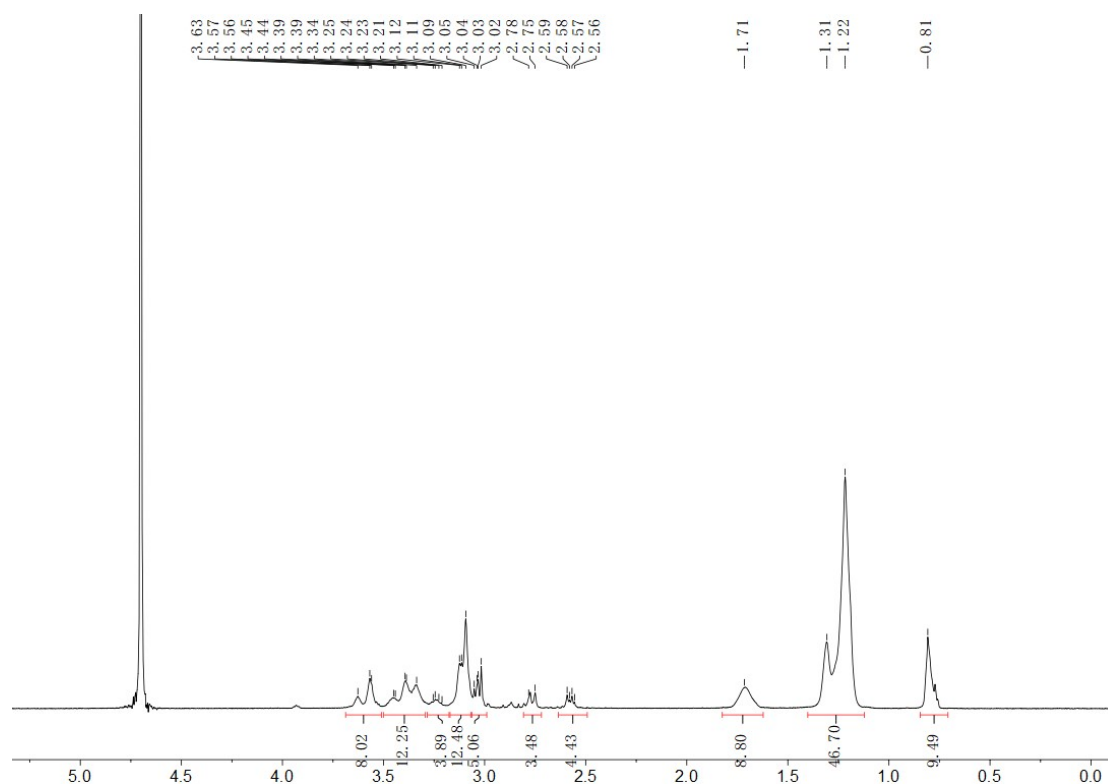

**Figure S2.** <sup>1</sup>H NMR spectra of **Citric-3C12** in D<sub>2</sub>O.

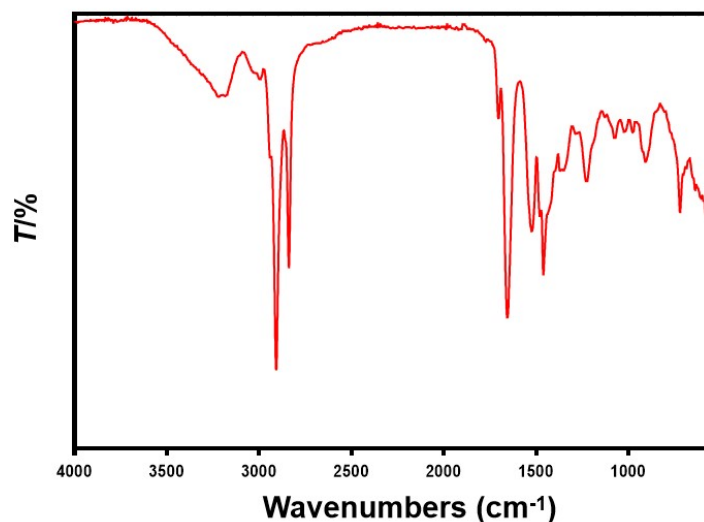

**Figure S3.** FT-IR spectra of **Citric-3C12**.

**Table S1.** Values of the CMC, interaction parameters ( $\beta^\sigma$ ,  $\beta^m$ ), interfacial composition ( $X^\sigma$ ), micellar composition ( $X^m$ ) Surface Excess ( $\Gamma_{\max}$ ), and Area Per Molecule ( $A_{\min}$ ) for the **Citric-3C12/9-EOS** mixture in aqueous solution at 25.0 °C

| $X_{\text{Citric-3C12}}$ | CMC (mM) | pC20 | $\chi^m$ | $\beta^m$ | $\chi^\sigma$ | $\beta^\sigma$ | $\Gamma \times 10^{-6}$ (mol m <sup>-2</sup> ) | $A$ (Å <sup>2</sup> /mole cule) | $A_{\text{ideal}}$ (Å <sup>2</sup> /mole cule) |
|--------------------------|----------|------|----------|-----------|---------------|----------------|------------------------------------------------|---------------------------------|------------------------------------------------|
| 1                        | 0.25     | 1.1  | -        | -         | -             | -              | 1.699                                          | 97.763                          | -                                              |
| 0.9                      | 0.052    | 1.9  | 0.491    | -3.721    | 0.42          | -4.012         | 1.835                                          | 90.526                          | 97.847                                         |
| 0.8                      | 0.038    | 2.2  | 0.419    | -3.665    | 0.365         | -4.431         | 2.015                                          | 82.418                          | 97.855                                         |
| 0.7                      | 0.022    | 2.4  | 0.398    | -5.148    | 0.383         | -7.605         | 2.303                                          | 72.104                          | 97.889                                         |
| 0.6                      | 0.018    | 2.5  | 0.38     | -5.656    | 0.362         | -7.678         | 2.031                                          | 81.778                          | 97.855                                         |
| 0.5                      | 0.00455  | 2.6  | 0.334    | -8.123    | 0.323         | -6.773         | 1.855                                          | 89.543                          | 97.861                                         |
| 0.4                      | 0.018    | 2.8  | 0.309    | -4.969    | 0.404         | -11.050        | 1.683                                          | 98.679                          | 97.849                                         |
| 0.3                      | 0.018    | 3.1  | 0.279    | -4.922    | 0.334         | -9.764         | 1.208                                          | 137.563                         | 97.859                                         |
| 0.2                      | 0.017    | 2.8  | 0.256    | -5.302    | 0.292         | -8.746         | 1.713                                          | 96.9632                         | 97.866                                         |
| 0.1                      | 0.012    | 2.8  | 0.275    | -7.702    | 0.277         | -9.694         | 1.574                                          | 105.547                         | 97.868                                         |
| 0                        | 0.022    | 2.4  | -        | -         | -             | -              | 1.697                                          | 97.914                          | -                                              |

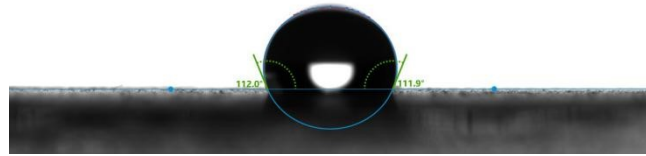

**Figure S4.** Contact angle photographs of water on oil-wet silica gel surfaces

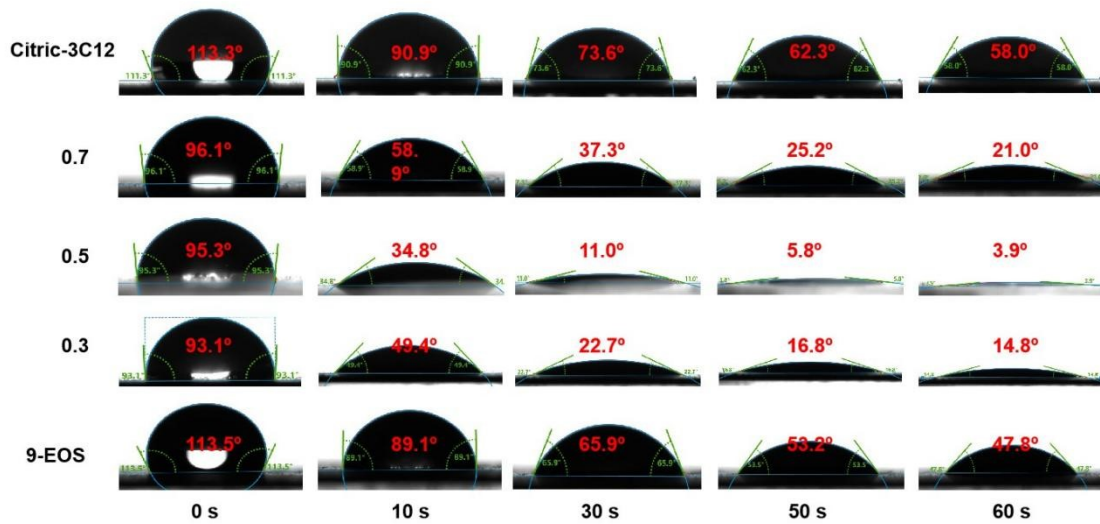

**Figure S5.** Contact angle photographs of oil-wet silica gel surfaces treated with **Citric-3C12/9-EOS** at  $X_{\text{Citric-3C12}} = 1.0, 0.7, 0.5, 0.3$  and  $0$ .
